# Supplementary material for: Association between Wine Consumption with Cardiovascular Disease and Cardiovascular Mortality: A Systematic Review and Meta-Analysis
Source: MDPI journal article supplement (doi:10.3390/nu15122785), 2023-06-17
Supplement: s1 [file s1]

**Table S1.** Complete search strategy for MEDLINE.

|                                                                                                                                                                           |            |                                                                                                       |            |                                                                                                                                                                                                                                                                                                                                                                                                       |            |                                                                                                                    |
|---------------------------------------------------------------------------------------------------------------------------------------------------------------------------|------------|-------------------------------------------------------------------------------------------------------|------------|-------------------------------------------------------------------------------------------------------------------------------------------------------------------------------------------------------------------------------------------------------------------------------------------------------------------------------------------------------------------------------------------------------|------------|--------------------------------------------------------------------------------------------------------------------|
| Adults<br><b>OR</b><br>“Young adults”<br><b>OR</b><br>“Elderly adults”<br><b>OR</b><br>“Older adults”<br><b>OR</b><br>“Adult population”<br><b>OR</b><br>“Adult subjects” | <b>AND</b> | Alcohol<br><b>OR</b><br>Wine<br><b>OR</b><br>“Alcohol consumption”<br><b>OR</b><br>“Wine consumption” | <b>AND</b> | CVD<br><b>OR</b><br>“Cardiovascular disease”<br><b>OR</b><br>“Coronary heart disease”<br><b>OR</b><br>“Heart failure”<br><b>OR</b><br>“Cardiovascular events”<br><b>OR</b><br>“Coronary artery disease”<br><b>OR</b><br>“Myocardial infarction”<br><b>OR</b><br>“Cardiovascular outcomes”<br><b>OR</b><br>Mortality<br><b>OR</b><br>“Cardiovascular mortality”<br><b>OR</b><br>“Cardiovascular death” | <b>AND</b> | Cohort<br><b>OR</b><br>“Case-control”<br><b>OR</b><br>“Longitudinal studies”<br><b>OR</b><br>“Prospective studies” |
|---------------------------------------------------------------------------------------------------------------------------------------------------------------------------|------------|-------------------------------------------------------------------------------------------------------|------------|-------------------------------------------------------------------------------------------------------------------------------------------------------------------------------------------------------------------------------------------------------------------------------------------------------------------------------------------------------------------------------------------------------|------------|--------------------------------------------------------------------------------------------------------------------|

**Table S2.** Adjustments to the results of each study.

| Reference                 | Adjusted for                                                                                                                                                                                                                                                                                                                                                                                                                           |
|---------------------------|----------------------------------------------------------------------------------------------------------------------------------------------------------------------------------------------------------------------------------------------------------------------------------------------------------------------------------------------------------------------------------------------------------------------------------------|
| Kaufman et al. 1985       | Age, geographic region of the hospital, religion, marital status, years of education, cigarette smoking, history of drug treatment for hypertension, history of abnormal blood lipids, history of drug treatment for diabetes mellitus, body mass index, family history of myocardial infarction or stroke, personality score, and minutes of aerobic exercise per week.                                                               |
| Klatsky et al. 1986       | Not adjusted.                                                                                                                                                                                                                                                                                                                                                                                                                          |
| Klatsky et al. 1990       | Age, gender, race, body mass index, marital status and education.                                                                                                                                                                                                                                                                                                                                                                      |
| Klatsky et al. 1992       | Age.                                                                                                                                                                                                                                                                                                                                                                                                                                   |
| Klatsky et al. 1993       | Age, gender, race, smoking, body mass index, marital status, education, coffee and tea.                                                                                                                                                                                                                                                                                                                                                |
| Gronbaek et al. 1995      | Not adjusted.                                                                                                                                                                                                                                                                                                                                                                                                                          |
| Renaud et al. 1999        | Age, smoking, education, body mass index and physical activity.                                                                                                                                                                                                                                                                                                                                                                        |
| Theobald et al. 2000      | Age, expected level of need for health services, total alcohol consumption, gender, body-mass index, to- bacco use and social class.                                                                                                                                                                                                                                                                                                   |
| Gronbaek et al. 2000      | Age, sex, smoking status, educational level, physical activity and body mass index.                                                                                                                                                                                                                                                                                                                                                    |
| Tavani et al. 2001        | Age, education, parity, age at menopause, oral contraceptive use, family history of ovarian/breast cancer, body mass index, and energy intake (without alcohol calories).                                                                                                                                                                                                                                                              |
| Mukamal et al. 2003       | Age, sex, race, apolipoprotein (APOE e4), status, educational attainment, income level, marital status, estrogen replacement therapy, current smoking, former smoking, diabetes, body mass index, total cholesterol level, atrial fibrillation, history of congestive heart failure, history of stroke, history of transient ischemic attack, kilocalories expended in daily activities, and consumption of other alcoholic beverages. |
| Marques-Vidal et al. 2004 | Study center, age, cigarette smoking, hyperlipidemia, hypertension status, body mass index and diabetes.                                                                                                                                                                                                                                                                                                                               |
| Dorn et al. 2007          | Age and education in years, race, BMI, smoking status (current, former, never) and menopausal status.                                                                                                                                                                                                                                                                                                                                  |
| Burke et al. 2007         | Cholesterol, blood pressure, waist girth, smoking habits and exercise.                                                                                                                                                                                                                                                                                                                                                                 |
| Schröder et al. 2007      | Age, total alcohol consumption, smoking, educational level, leisure-time physical activity, total cholesterol, LDL-cholesterol, HDL-cholesterol, diabetes, hypercholesterolemia drug treatment, and diagnosed hypertension.                                                                                                                                                                                                            |
| Suadicani et al. 2008     | Age.                                                                                                                                                                                                                                                                                                                                                                                                                                   |
| Gémes et al. 2016         | Age, sex, level of education, cohabiting, smoking, physical activity and body mass index.                                                                                                                                                                                                                                                                                                                                              |
| Britton et al. 2016       | Not adjusted.                                                                                                                                                                                                                                                                                                                                                                                                                          |
| Tverdal et al. 2017       | Age and sex.                                                                                                                                                                                                                                                                                                                                                                                                                           |
| Ricci et al. 2018         | Age at recruitment, body mass index, height, physical activity, smoking status and history of hypertension                                                                                                                                                                                                                                                                                                                             |
| Song et al. 2018          | Age, sex, body mass index, race, smoking, education and exercise.                                                                                                                                                                                                                                                                                                                                                                      |
| Panagiotakos et al. 2019  | Age, sex, smoking (years), physical activity (active / inactive), BMI, education in years of school, MedDietScore, alcohol quantity, history of hypertension, diabetes mellitus and hypercholesterolemia.                                                                                                                                                                                                                              |
| Schutte et al. 2020       | Sex, age and body mass index.                                                                                                                                                                                                                                                                                                                                                                                                          |
| Maugeri et al. 2020       | Number of drinking days, age, gender, educational level, and employment status.                                                                                                                                                                                                                                                                                                                                                        |
| Schutte et al. 2021       | Age, body mass index (BMI), sex, smoking, systolic blood pressure, diagnosis of diabetes and Townsend deprivation index.                                                                                                                                                                                                                                                                                                               |

**Table S3.** Risk of bias assessment table using Quality Assessment Tool for Observational Cohort and Cross-Sectional Studies.

| References                | Items |   |   |   |   |   |   |   |   |    |    |    |    |    | Quality |
|---------------------------|-------|---|---|---|---|---|---|---|---|----|----|----|----|----|---------|
|                           | 1     | 2 | 3 | 4 | 5 | 6 | 7 | 8 | 9 | 10 | 11 | 12 | 13 | 14 |         |
| Klatsky et al. 1986       | Y     | Y | Y | Y | N | Y | Y | Y | Y | N  | Y  | NR | Y  | Y  | Good    |
| Klatsky et al. 1990       | Y     | Y | Y | Y | N | Y | Y | Y | Y | N  | Y  | NR | Y  | Y  | Good    |
| Klatsky et al. 1992       | Y     | Y | Y | Y | N | Y | Y | Y | Y | N  | Y  | NR | Y  | Y  | Good    |
| Klatsky et al. 1993       | Y     | Y | Y | Y | N | Y | Y | Y | Y | N  | Y  | NR | Y  | Y  | Good    |
| Gronbaek et al. 1995      | Y     | Y | Y | Y | Y | Y | Y | Y | Y | Y  | Y  | Y  | Y  | Y  | Good    |
| Renaud et al. 1999        | Y     | Y | Y | Y | N | Y | Y | Y | Y | N  | Y  | NR | Y  | Y  | Good    |
| Theobald et al. 2000      | Y     | Y | Y | Y | N | Y | Y | Y | Y | N  | Y  | NR | Y  | Y  | Good    |
| Gronbaek et al. 2000      | Y     | Y | Y | Y | N | Y | Y | Y | Y | N  | Y  | NR | Y  | Y  | Good    |
| Mukamal et al. 2003       | Y     | Y | Y | Y | N | Y | Y | Y | Y | N  | Y  | NR | Y  | Y  | Good    |
| Marques-Vidal et al. 2004 | Y     | Y | Y | Y | N | Y | Y | Y | Y | Y  | Y  | NR | Y  | Y  | Good    |
| Burke et al. 2007         | Y     | Y | Y | Y | Y | Y | Y | Y | Y | N  | Y  | NR | Y  | Y  | Good    |
| Suadicani et al. 2008     | Y     | Y | Y | Y | N | Y | Y | Y | Y | N  | Y  | NR | Y  | Y  | Good    |
| Gémes et al. 2016         | Y     | Y | Y | Y | N | Y | Y | Y | Y | N  | Y  | NR | Y  | Y  | Good    |
| Britton et al. 2016       | Y     | Y | Y | Y | Y | Y | Y | Y | Y | N  | Y  | NR | Y  | Y  | Good    |
| Tverdal et al. 2017       | Y     | Y | Y | Y | N | Y | Y | Y | Y | N  | Y  | NR | Y  | Y  | Good    |
| Ricci et al. 2018         | Y     | Y | Y | Y | N | Y | Y | Y | Y | N  | Y  | NR | Y  | Y  | Good    |
| Song et al. 2018          | Y     | Y | Y | Y | Y | Y | Y | Y | Y | N  | Y  | NR | Y  | Y  | Good    |
| Panagiotakos et al. 2019  | Y     | Y | Y | Y | Y | Y | Y | Y | Y | N  | Y  | NR | Y  | Y  | Good    |
| Schutte et al. 2020       | Y     | Y | Y | Y | Y | Y | Y | Y | Y | N  | Y  | NR | Y  | Y  | Good    |
| Maugeri et al. 2020       | Y     | Y | Y | Y | Y | Y | Y | Y | Y | N  | Y  | NR | Y  | Y  | Good    |
| Schutte et al. 2021       | Y     | Y | Y | Y | Y | Y | Y | Y | Y | N  | Y  | NR | Y  | Y  | Good    |

1. Was the research question or objective in this paper clearly stated?; 2. Was the study population clearly specified and defined?; 3. Was the participation rate of eligible persons at least 50%?; 4. Were all the subjects selected or recruited from the same or similar populations (including the same time period)? Were inclusion and exclusion criteria for being in the study prespecified and applied uniformly to all participants?; 5. Was a sample size justification, power description, or variance and effect estimates provided?; 6. For the analyses in this paper, were the exposure(s) of interest measured prior to the outcome(s) being measured?; 7. Was the timeframe sufficient so that one could reasonably expect to see an association between exposure and outcome if it existed?; 8. For exposures that can vary in amount or level, did the study examine different levels of the exposure as related to the outcome (e.g., categories of exposure, or exposure measured as continuous variable)?; 9. Were the exposure measures (independent variables) clearly defined, valid, reliable, and implemented consistently across all study participants?; 10. Was the exposure(s) assessed more than once over time?; 11. Were the outcome measures (dependent variables) clearly defined, valid, reliable, and implemented consistently across all study participants?; 12. Were the outcome assessors blinded to the exposure status of participants?; 13. Was loss to follow-up after baseline 20% or less?; 14. Were key potential confounding variables measured and adjusted statistically for their impact on the relationship between exposure(s) and outcome(s)?; N: no; NR: not reported; Y: yes.

**Table S4.** Risk of bias assessment table using Quality Assessment Tool for Case-Control Studies

| References           | Items |   |   |   |   |   |   |   |   |    |    |    | Quality |
|----------------------|-------|---|---|---|---|---|---|---|---|----|----|----|---------|
|                      | 1     | 2 | 3 | 4 | 5 | 6 | 7 | 8 | 9 | 10 | 11 | 12 |         |
| Kaufman et al. 1985  | Y     | Y | Y | Y | Y | Y | N | Y | Y | Y  | N  | Y  | Good    |
| Tavani et al. 2001   | Y     | Y | Y | Y | Y | Y | Y | Y | Y | Y  | NR | Y  | Good    |
| Dorn et al. 2007     | Y     | Y | Y | Y | Y | Y | Y | Y | Y | Y  | Y  | Y  | Good    |
| Schröder et al. 2007 | Y     | Y | Y | Y | Y | Y | Y | Y | Y | Y  | NR | Y  | Good    |

1. Was the research question or objective in this paper clearly stated and appropriate?; 2. Was the study population clearly specified and defined?; 3. Did the authors include a sample size justification?; 4. Were controls selected or recruited from the same or similar population that gave rise to the cases (including the same timeframe)?; 5. Were the definitions, inclusion and exclusion criteria, algorithms or processes used to identify or select cases and controls valid, reliable, and implemented consistently across all study participants?; 6. Were the cases clearly defined and differentiated from controls?; 7. If less than 100 percent of eligible cases and/or controls were selected for the study, were the cases and/or controls randomly selected from those eligible?; 8. Was there use of concurrent controls?; 9. C If matching was used, did the investigators account for matching during study analysis?; 10. Were the measures of exposure/risk clearly defined, valid, reliable, and implemented consistently (including the same time period) across all study participants?; 11. Were the assessors of exposure/risk blinded to the case or control status of participants?; 12. Were key potential confounding variables measured and adjusted statistically in the analyses?; N: no; NR: not reported; Y: yes.

**Table S5.** Sensitivity analysis.

| <b>CHD</b>                |           |           |           |
|---------------------------|-----------|-----------|-----------|
| <b>Reference</b>          | <b>RR</b> | <b>LL</b> | <b>UL</b> |
| Kaufman et al. 1985       | 0,7824    | 0,635     | 0,814     |
| Klatsky et al. 1986       | 0,722     | 0,631     | 0,813     |
| Gronbaek et al. 2000      | 0,741     | 0,649     | 0,833     |
| Tavani et al. 2001        | 0,744     | 0,652     | 0,835     |
| Mukamal et al. 2003       | 0,724     | 0,632     | 0,815     |
| Mukamal et al. 2003       | 0,718     | 0,624     | 0,812     |
| Marques-Vidal et al. 2004 | 0,713     | 0,618     | 0,808     |
| Marques-Vidal et al. 2004 | 0,742     | 0,653     | 0,831     |
| Dorn et al. 2007          | 0,734     | 0,642     | 0,826     |
| Gémes et al. 2016         | 0,724     | 0,626     | 0,820     |
| Song et al. 2018          | 0,719     | 0,622     | 0,815     |
| Ricci et al. 2018         | 0,716     | 0,616     | 0,816     |
| Schutte et al. 2021       | 0,726     | 0,626     | 0,826     |

| <b>CVD</b>               |           |           |           |
|--------------------------|-----------|-----------|-----------|
| <b>Reference</b>         | <b>RR</b> | <b>LL</b> | <b>UL</b> |
| Renaud et al. 1999       | 0,750     | 0,551     | 0,950     |
| Burke et al. 2007        | 0,830     | 0,691     | 0,969     |
| Tverdal et al. 2017      | 0,767     | 0,581     | 0,953     |
| Panagiotakos et al. 2019 | 0,808     | 0,650     | 0,966     |
| Maugeri et al. 2020      | 0,748     | 0,549     | 0,947     |
| Schutte et al. 2021      | 0,730     | 0,596     | 0,865     |

| <b>Cardiovascular mortality</b> |           |           |           |
|---------------------------------|-----------|-----------|-----------|
| <b>Reference</b>                | <b>RR</b> | <b>LL</b> | <b>UL</b> |
| Klatsky et al. 1992             | 0,713     | 0,560     | 0,866     |
| Klatsky et al. 1992             | 0,678     | 0,525     | 0,831     |
| Klatsky et al. 1993             | 0,702     | 0,537     | 0,866     |
| Gronbaek et al. 1995            | 0,737     | 0,593     | 0,881     |
| Theobald et al. 2000            | 0,724     | 0,578     | 0,869     |
| Suadicani et al. 2008           | 0,679     | 0,524     | 0,835     |
| Britton et al. 2016             | 0,664     | 0,558     | 0,770     |

**Table S6.** Meta-regression according to mean age, percentage of female and follow-up of wine exposure on ischaemic heart disease, cardiovascular disease and cardiovascular mortality.

|                                 | <b>Coefficient</b> | <b>95%ICs</b> | <b>P value</b> |
|---------------------------------|--------------------|---------------|----------------|
| <b>Ischaemic heart disease</b>  |                    |               |                |
| Mean age                        | -0.011             | -0.046, 0.024 | 0.508          |
| Percentage of female            | -0.007             | -0.007, 0.006 | 0.813          |
| Follow-up                       | -0.007             | -0.016, 0.015 | 0.917          |
| Current smokers                 | -0,007             | -0.016, 0.001 | 0.081          |
| <b>Cardiovascular disease</b>   |                    |               |                |
| Mean age                        | -0.005             | -0.075, 0.065 | 0.833          |
| Percentage of female            | 0.001              | -0.010, 0.012 | 0.779          |
| Follow-up                       | -0.015             | -0.153, 0.122 | 0.743          |
| Current smokers                 | -0,008             | -0.017, 0,000 | 0,049          |
| <b>Cardiovascular mortality</b> |                    |               |                |
| Mean age                        | 0.040              | -0.020, 0.099 | 0.148          |
| Percentage of female            | 0.001              | -0.014, 0.017 | 0.833          |
| Follow-up                       | 0.023              | -0.026, 0.073 | 0.276          |
| Current smokers                 | -0.002             | -0.031, 0.027 | 0.870          |
